# Supplementary material for: Mediator independently orchestrates multiple steps of preinitiation complex assembly in vivo
Source: PubMed Central journal article supplement — Nucleic Acids Res. 2015 Aug 3;43(19):9214–31. doi: 10.1093/nar/gkv782 (PMC4627066; doi:10.1093/nar/gkv782), 2015-08-03

## Supplementary Data

### **Mediator independently orchestrates multiple steps of preinitiation complex assembly *in vivo***

Fanny Eyboulet, Sandra Wydau-Dematteis, Thomas Eychenne, Olivier Alibert, Helen Neil, Claire Boschiero, Marie-Claire Nevers, Hervé Volland, David Cornu, Virginie Redeker, Michel Werner and Julie Soutourina

### **Supplementary Materials and Methods**

#### ***Plasmid constructions and cloning***

Plasmids are listed in supplementary Table S2. All cloning experiments were done using the Gateway Invitrogen cloning method. Wild-type *MED17* gene was amplified from YPH499 genomic DNA using oligonucleotides matching the gene sequence initiation codon and following codons for the 5' forward primer and the stop codon and preceding codons for the 3' reverse primer. The oligonucleotides were flanked with *attB1* or *attB2* sequences, respectively. The amplified sequence was cloned into pDONR201 (Invitrogen) using standard BP reaction. The recombinant plasmid was sequence verified. The cloned sequence was then transferred into pVV208 (CEN URA3), pVV204 (CEN TRP1) (1), pAG414-GPD-EGFP or pAG415-GPD vector (2) by the LR reaction.

Point mutations and M504P mutation in Med17 equivalent to human L371P mutation were obtained using QuikChange Lightning site-directed mutagenesis kit (Agilent), cloned using the Gateway standard method and transferred into pVV204.

#### ***Yeast strains***

Strains are listed in supplementary Table S1. *MED17* was deleted in YPH499 (*MATa ura3-52 his3-Δ200 ade2-101uaa trp1-Δ63 lys2-80luag leu2-Δ1*) complemented with pVV208-*MED17* and replaced by a KanMX6 marker using the standard one-step method (3). *med17* conditional mutants were obtained as previously described (4).

Med5-HA, Med6-HA, Med15-HA, Rad3-HA and Kin28-HA strains carrying C-terminal HA-tagged version of Med5, Med6 and Med15 Mediator subunits, Rad3 and Kin28 TFIIH subunits were constructed by inserting 3HA epitopes followed by His3MX6 marker using the standard one-step methods. The HA-TBP strain expressing N-terminal HA-tagged version of TBP was obtained by inserting 3HA epitopes preceded by *LEU2* marker.

Med17-EGFP Rpb3-Myc double-tagged strains were derived from Y4945 (*med17Δ/pVV208-MED17*) strain that was first tagged for Rpb3-Myc by insertion of 13Myc epitopes followed by a HISMX marker using the standard one-step method, then transformed by pAG414-GPD-EGFP-MED17 plasmid. Finally, *MED17 URA3* plasmid was chased on 5-FOA medium.

Med17 mutants and a WT strain for Mediator purification were derived from protease-deficient CA001 strain (*MATa leu2 trp1 ura3-52 prb1-1122 pep4-3 prc1-407 gal2 MED22 ::10His-TEV-ProteinA::KITRPI MED8-PreSci-3HA::KanR*) carrying C-terminal HA-tagged version of Med8 and C-terminal 10xHis-TEV-ProteinA-tagged version of Med22 (5). *MED17* was deleted in CA001 complemented with pVV208-*MED17* and replaced by a natNT2 marker from pFA6a-natNT2 (6) using the standard one-step method, then transformed by pAG415-GPD-MED17 or *med17*-mutant plasmids. Finally, *MED17 URA3* plasmid was chased on 5-FOA medium.

Unless otherwise stated, yeast strains were grown at 30°C in YPD rich medium containing 2% of glucose. For galactose induction, yeast cells were grown in YP Raffinose rich medium containing 2% of raffinose. Galactose was then added to reach 2% final concentration.

**Table S1. Yeast strains**

| <b>Name</b> | <b>Tagged or Mutant protein</b> | <b>Genotype</b>                                                                                            | <b>Reference</b> |
|-------------|---------------------------------|------------------------------------------------------------------------------------------------------------|------------------|
| YPH499      | WT                              | <i>MATa ura3-52 his3-Δ200 ade2-101uaa trp1-Δ63 lys2-80luag leu2-Δ1</i>                                     | (7)              |
| Y4945       | <i>MED17</i>                    | <i>MATa ura3-52 his3-Δ200 ade2-101uaa trp1-Δ63 lys2-80luag leu2-Δ1 med17::KanMX6 // * MED17 CEN URA3</i>   | (4)              |
| Y5084       | <i>MED17</i>                    | <i>MATa ura3-52 his3-Δ200 ade2-101uaa trp1-Δ63 lys2-80luag leu2-Δ1 med17::KanMX6 // MED17 CEN TRP1</i>     | (4)              |
| Y 5304      | <i>med17-8</i>                  | <i>MATa ura3-52 his3-Δ200 ade2-101uaa trp1-Δ63 lys2-80luag leu2-Δ1 med17::KanMX6 // med17-8 CEN TRP1</i>   | This work        |
| Y 5305      | <i>med17-68</i>                 | <i>MATa ura3-52 his3-Δ200 ade2-101uaa trp1-Δ63 lys2-80luag leu2-Δ1 med17::KanMX6 // med17-68 CEN TRP1</i>  | This work        |
| Y 5306      | <i>med17-95</i>                 | <i>MATa ura3-52 his3-Δ200 ade2-101uaa trp1-Δ63 lys2-80luag leu2-Δ1 med17::KanMX6 // med17-95 CEN TRP1</i>  | This work        |
| Y 5307      | <i>med17-96</i>                 | <i>MATa ura3-52 his3-Δ200 ade2-101uaa trp1-Δ63 lys2-80luag leu2-Δ1 med17::KanMX6 // med17-96 CEN TRP1</i>  | This work        |
| Y5308       | <i>med17-98</i>                 | <i>MATa ura3-52 his3-Δ200 ade2-101uaa trp1-Δ63 lys2-80luag leu2-Δ1 med17::KanMX6 // med17-98 CEN TRP1</i>  | This work        |
| Y5309       | <i>med17-140</i>                | <i>MATa ura3-52 his3-Δ200 ade2-101uaa trp1-Δ63 lys2-80luag leu2-Δ1 med17::KanMX6 // med17-140 CEN TRP1</i> | (8)              |
| Y5310       | <i>med17-157</i>                | <i>MATa ura3-52 his3-Δ200 ade2-101uaa trp1-Δ63 lys2-80luag leu2-Δ1 med17::KanMX6 // med17-157 CEN TRP1</i> | This work        |
| Y5311       | <i>med17-158</i>                | <i>MATa ura3-52 his3-Δ200 ade2-101uaa trp1-Δ63 lys2-80luag leu2-Δ1 med17::KanMX6 // med17-158 CEN TRP1</i> | This work        |
| Y5312       | <i>med17-187</i>                | <i>MATa ura3-52 his3-Δ200 ade2-101uaa trp1-Δ63 lys2-80luag leu2-Δ1 med17::KanMX6 // med17-187 CEN TRP1</i> | This work        |
| Y5313       | <i>med17-208</i>                | <i>MATa ura3-52 his3-Δ200 ade2-101uaa trp1-Δ63 lys2-80luag leu2-Δ1 med17::KanMX6 // med17-208 CEN TRP1</i> | This work        |
| Y5314       | <i>med17-218</i>                | <i>MATa ura3-52 his3-Δ200 ade2-101uaa trp1-Δ63 lys2-80luag leu2-Δ1 med17::KanMX6 // med17-218 CEN TRP1</i> | This work        |
| Y5315       | <i>med17-233</i>                | <i>MATa ura3-52 his3-Δ200 ade2-101uaa trp1-Δ63 lys2-80luag leu2-Δ1 med17::KanMX6 // med17-233 CEN TRP1</i> | (8)              |
| Y5316       | <i>med17-239</i>                | <i>MATa ura3-52 his3-Δ200 ade2-101uaa trp1-Δ63 lys2-80luag leu2-Δ1 med17::KanMX6 // med17-239 CEN TRP1</i> | This work        |
| Y5317       | <i>med17-241</i>                | <i>MATa ura3-52 his3-Δ200 ade2-101uaa trp1-Δ63 lys2-80luag leu2-Δ1 med17::KanMX6 // med17-241 CEN TRP1</i> | This work        |
| Y5318       | <i>med17-248</i>                | <i>MATa ura3-52 his3-Δ200 ade2-101uaa trp1-Δ63 lys2-80luag leu2-Δ1 med17::KanMX6 // med17-248 CEN TRP1</i> | This work        |
| Y5319       | <i>med17-247</i>                | <i>MATa ura3-52 his3-Δ200 ade2-101uaa trp1-Δ63 lys2-80luag leu2-Δ1 med17::KanMX6 // med17-247 CEN TRP1</i> | This work        |
| Y5320       | <i>med17-249</i>                | <i>MATa ura3-52 his3-Δ200 ade2-101uaa trp1-Δ63 lys2-80luag leu2-Δ1 med17::KanMX6 // med17-249 CEN TRP1</i> | This work        |
| Y5321       | <i>med17-257</i>                | <i>MATa ura3-52 his3-Δ200 ade2-101uaa trp1-Δ63 lys2-80luag leu2-Δ1 med17::KanMX6 // med17-257 CEN TRP1</i> | (8)              |
| Y5322       | <i>med17-299</i>                | <i>MATa ura3-52 his3-Δ200 ade2-101uaa trp1-Δ63 lys2-80luag leu2-Δ1 med17::KanMX6 // med17-299 CEN TRP1</i> | This work        |
| Y5323       | <i>med17-326</i>                | <i>MATa ura3-52 his3-Δ200 ade2-101uaa trp1-Δ63 lys2-80luag leu2-Δ1 med17::KanMX6 // med17-326 CEN TRP1</i> | This work        |
| Y5327       | <i>med17-327</i>                | <i>MATa ura3-52 his3-Δ200 ade2-101uaa trp1-Δ63 lys2-80luag leu2-Δ1 med17::KanMX6 // med17-327 CEN TRP1</i> | This work        |
| Y5328       | <i>med17-348</i>                | <i>MATa ura3-52 his3-Δ200 ade2-101uaa trp1-Δ63 lys2-80luag leu2-Δ1 med17::KanMX6 // med17-348 CEN TRP1</i> | This work        |
| Y5324       | <i>med17-370</i>                | <i>MATa ura3-52 his3-Δ200 ade2-101uaa trp1-Δ63 lys2-80luag leu2-Δ1 med17::KanMX6 // med17-370 CEN TRP1</i> | This work        |
| Y5329       | <i>med17-396</i>                | <i>MATa ura3-52 his3-Δ200 ade2-101uaa trp1-Δ63 lys2-80luag leu2-Δ1 med17::KanMX6 // med17-396 CEN TRP1</i> | This work        |
| Y5331       | <i>med17-404</i>                | <i>MATa ura3-52 his3-Δ200 ade2-101uaa trp1-Δ63 lys2-80luag leu2-</i>                                       | This work        |

|              |                  |                                                                                                                             |           |
|--------------|------------------|-----------------------------------------------------------------------------------------------------------------------------|-----------|
|              |                  | <i>Δ1 med17::KanMX6 // med17-404 CEN TRP1</i>                                                                               |           |
| <b>Y5325</b> | <i>med17-444</i> | <i>MATa ura3-52 his3-Δ200 ade2-101uaa trp1-Δ63 lys2-80luag leu2-Δ1 med17::KanMX6 // med17-444 CEN TRP1</i>                  | This work |
| <b>Y6106</b> | <i>med17-504</i> | <i>MATa ura3-52 his3-Δ200 ade2-101uaa trp1-Δ63 lys2-80luag leu2-Δ1 med17::KanMX6 // med17-504 CEN TRP1</i>                  | This work |
| <b>Y5326</b> | <i>med17-510</i> | <i>MATa ura3-52 his3-Δ200 ade2-101uaa trp1-Δ63 lys2-80luag leu2-Δ1 med17::KanMX6 // med17-510 CEN TRP1</i>                  | This work |
| <b>Y5327</b> | <i>med17-546</i> | <i>MATa ura3-52 his3-Δ200 ade2-101uaa trp1-Δ63 lys2-80luag leu2-Δ1 med17::KanMX6 // med17-546 CEN TRP1</i>                  | (8)       |
| <b>Y5328</b> | <i>med17-670</i> | <i>MATa ura3-52 his3-Δ200 ade2-101uaa trp1-Δ63 lys2-80luag leu2-Δ1 med17::KanMX6 // med17-670 CEN TRP1</i>                  | This work |
| <b>Y5485</b> | Med5-HA          | <i>MATa ura3-52 his3-Δ200 ade2-101uaa trp1-Δ63 lys2-80luag leu2-Δ1 med17::KanMX6 // MED17 CEN TRP1 MED5::3HA::HIS3</i>      | This work |
| <b>Y5773</b> | Med6-HA          | <i>MATa ura3-52 his3-Δ200 ade2-101uaa trp1-Δ63 lys2-80luag leu2-Δ1 med17::KanMX6 // MED17 CEN TRP1 MED6::3HA::HIS3</i>      | This work |
| <b>Y5540</b> | Med15-HA         | <i>MATa ura3-52 his3-Δ200 ade2-101uaa trp1-Δ63 lys2-80luag leu2-Δ1 med17::KanMX6 // MED17 CEN TRP1 MED15::3HA::HIS3</i>     | (8)       |
| <b>Y5551</b> | HA-TBP           | <i>MATa ura3-52 his3-Δ200 ade2-101uaa trp1-Δ63 lys2-80luag leu2-Δ1 LEU2::3HA::SPT15 med17::KanMX6 // MED17 CEN TRP1</i>     | This work |
| <b>Y5557</b> | Rad3-HA          | <i>MATa ura3-52 his3-Δ200 ade2-101uaa trp1-Δ63 lys2-80luag leu2-Δ1 RAD3::3HA::HIS3 med17::KanMX6 // MED17 CEN TRP1</i>      | This work |
| <b>Y5545</b> | Kin28-HA         | <i>MATa ura3-52 his3-Δ200 ade2-101uaa trp1-Δ63 lys2-80luag leu2-Δ1 KIN28::3HA::HIS3 med17::KanMX6 // MED17 CEN TRP1</i>     | This work |
| <b>Y5637</b> | Med15-HA         | <i>MATa ura3-52 his3-Δ200 ade2-101uaa trp1-Δ63 lys2-80luag leu2-Δ1 MED15::3HA::HIS3 med17::KanMX6 // med17-98 CEN TRP1</i>  | This work |
| <b>Y5643</b> | Med15-HA         | <i>MATa ura3-52 his3-Δ200 ade2-101uaa trp1-Δ63 lys2-80luag leu2-Δ1 MED15::3HA::HIS3 med17::KanMX6 // med17-257 CEN TRP1</i> | This work |
| <b>Y5538</b> | Med15-HA         | <i>MATa ura3-52 his3-Δ200 ade2-101uaa trp1-Δ63 lys2-80luag leu2-Δ1 MED15::3HA::HIS3 med17::KanMX6 // med17-326 CEN TRP1</i> | This work |
| <b>Y5639</b> | Med15-HA         | <i>MATa ura3-52 his3-Δ200 ade2-101uaa trp1-Δ63 lys2-80luag leu2-Δ1 MED15::3HA::HIS3 med17::KanMX6 // med17-444 CEN TRP1</i> | This work |
| <b>Y5640</b> | Med15-HA         | <i>MATa ura3-52 his3-Δ200 ade2-101uaa trp1-Δ63 lys2-80luag leu2-Δ1 MED15::3HA::HIS3 med17::KanMX6 // med17-546 CEN TRP1</i> | This work |
| <b>Y5641</b> | Med15-HA         | <i>MATa ura3-52 his3-Δ200 ade2-101uaa trp1-Δ63 lys2-80luag leu2-Δ1 MED15::3HA::HIS3 med17::KanMX6 // med17-670 CEN TRP1</i> | This work |
| <b>Y6063</b> | Med15-HA         | <i>MATa ura3-52 his3-Δ200 ade2-101uaa trp1-Δ63 lys2-80luag leu2-Δ1 MED15::3HA::HIS3 med17::KanMX6 // med17-504 CEN TRP1</i> | This work |
| <b>Y5491</b> | Med5-HA          | <i>MATa ura3-52 his3-Δ200 ade2-101uaa trp1-Δ63 lys2-80luag leu2-Δ1 MED5::3HA::HIS3 med17::KanMX6 // med17-98 CEN TRP1</i>   | This work |
| <b>Y5489</b> | Med5-HA          | <i>MATa ura3-52 his3-Δ200 ade2-101uaa trp1-Δ63 lys2-80luag leu2-Δ1 MED5::3HA::HIS3 med17::KanMX6 // med17-258 CEN TRP1</i>  | This work |
| <b>Y5520</b> | Med5-HA          | <i>MATa ura3-52 his3-Δ200 ade2-101uaa trp1-Δ63 lys2-80luag leu2-Δ1 MED5::3HA::HIS3 med17::KanMX6 // med17-326 CEN TRP1</i>  | This work |
| <b>Y5494</b> | Med5-HA          | <i>MATa ura3-52 his3-Δ200 ade2-101uaa trp1-Δ63 lys2-80luag leu2-Δ1 MED5::3HA::HIS3 med17::KanMX6 // med17-444 CEN TRP1</i>  | This work |
| <b>Y5496</b> | Med5-HA          | <i>MATa ura3-52 his3-Δ200 ade2-101uaa trp1-Δ63 lys2-80luag leu2-Δ1 MED5::3HA::HIS3 med17::KanMX6 // med17-546 CEN TRP1</i>  | This work |
| <b>Y5521</b> | Med5-HA          | <i>MATa ura3-52 his3-Δ200 ade2-101uaa trp1-Δ63 lys2-80luag leu2-Δ1 MED5::3HA::HIS3 med17::KanMX6 // med17-670 CEN TRP1</i>  | This work |
| <b>Y6060</b> | Med5-HA          | <i>MATa ura3-52 his3-Δ200 ade2-101uaa trp1-Δ63 lys2-80luag leu2-Δ1 MED5::3HA::HIS3 med17::KanMX6 // med17-504 CEN TRP1</i>  | This work |
| <b>Y5774</b> | Med6-HA          | <i>MATa ura3-52 his3-Δ200 ade2-101uaa trp1-Δ63 lys2-80luag leu2-Δ1 MED6::3HA::HIS3 med17::KanMX6 // med17-98 CEN TRP1</i>   | This work |

|              |                              |                                                                                                                                   |           |
|--------------|------------------------------|-----------------------------------------------------------------------------------------------------------------------------------|-----------|
| <b>Y5779</b> | Med6-HA<br><i>med17-257</i>  | <i>MATa ura3-52 his3-Δ200 ade2-101uaa trp1-Δ63 lys2-80luag leu2-Δ1 MED6::3HA::HIS3 med17::KanMX6 // med17-257 CEN TRP1</i>        | This work |
| <b>Y5775</b> | Med6-HA<br><i>med17-326</i>  | <i>MATa ura3-52 his3-Δ200 ade2-101uaa trp1-Δ63 lys2-80luag leu2-Δ1 MED6::3HA::HIS3 med17::KanMX6 // med17-326 CEN TRP1</i>        | This work |
| <b>Y5776</b> | Med6-HA<br><i>med17-444</i>  | <i>MATa ura3-52 his3-Δ200 ade2-101uaa trp1-Δ63 lys2-80luag leu2-Δ1 MED6::3HA::HIS3 med17::KanMX6 // med17-444 CEN TRP1</i>        | This work |
| <b>Y5777</b> | Med6-HA<br><i>med17-546</i>  | <i>MATa ura3-52 his3-Δ200 ade2-101uaa trp1-Δ63 lys2-80luag leu2-Δ1 MED6::3HA::HIS3 med17::KanMX6 // med17-546 CEN TRP1</i>        | This work |
| <b>Y7778</b> | Med6-HA<br><i>med17-670</i>  | <i>MATa ura3-52 his3-Δ200 ade2-101uaa trp1-Δ63 lys2-80luag leu2-Δ1 MED6::3HA::HIS3 med17::KanMX6 // med17-670 CEN TRP1</i>        | This work |
| <b>Y6061</b> | Med6-HA<br><i>med17-504</i>  | <i>MATa ura3-52 his3-Δ200 ade2-101uaa trp1-Δ63 lys2-80luag leu2-Δ1 MED6::3HA::HIS3 med17::KanMX6 // med17-504 CEN TRP1</i>        | This work |
| <b>Y5558</b> | Rad3-HA<br><i>med17-98</i>   | <i>MATa ura3-52 his3-Δ200 ade2-101uaa trp1-Δ63 lys2-80luag leu2-Δ1 RAD3::3HA::HIS3 med17::KanMX6 // med17-98 CEN TRP1</i>         | This work |
| <b>Y5602</b> | Rad3-HA<br><i>med17-257</i>  | <i>MATa ura3-52 his3-Δ200 ade2-101uaa trp1-Δ63 lys2-80luag leu2-Δ1 RAD3::3HA::HIS3 med17::KanMX6 // med17-257 CEN TRP1</i>        | This work |
| <b>Y5559</b> | Rad3-HA<br><i>med17-326</i>  | <i>MATa ura3-52 his3-Δ200 ade2-101uaa trp1-Δ63 lys2-80luag leu2-Δ1 RAD3::3HA::HIS3 med17::KanMX6 // med17-326 CEN TRP1</i>        | This work |
| <b>Y5560</b> | Rad3-HA<br><i>med17-444</i>  | <i>MATa ura3-52 his3-Δ200 ade2-101uaa trp1-Δ63 lys2-80luag leu2-Δ1 RAD3::3HA::HIS3 med17::KanMX6 // med17-444 CEN TRP1</i>        | This work |
| <b>Y5561</b> | Rad3-HA<br><i>med17-546</i>  | <i>MATa ura3-52 his3-Δ200 ade2-101uaa trp1-Δ63 lys2-80luag leu2-Δ1 RAD3::3HA::HIS3 med17::KanMX6 // med17-546 CEN TRP1</i>        | This work |
| <b>Y5562</b> | Rad3-HA<br><i>med17-670</i>  | <i>MATa ura3-52 his3-Δ200 ade2-101uaa trp1-Δ63 lys2-80luag leu2-Δ1 RAD3::3HA::HIS3 med17::KanMX6 // med17-670 CEN TRP1</i>        | This work |
| <b>Y6025</b> | Rad3-HA<br><i>med17-504</i>  | <i>MATa ura3-52 his3-Δ200 ade2-101uaa trp1-Δ63 lys2-80luag leu2-Δ1 RAD3::3HA::HIS3 med17::KanMX6 // med17-504 CEN TRP1</i>        | This work |
| <b>Y5546</b> | Kin28-HA<br><i>med17-98</i>  | <i>MATa ura3-52 his3-Δ200 ade2-101uaa trp1-Δ63 lys2-80luag leu2-Δ1 KIN28::3HA::HIS3 med17::KanMX6 // med17-98 CEN TRP1</i>        | This work |
| <b>Y5600</b> | Kin28-HA<br><i>med17-257</i> | <i>MATa ura3-52 his3-Δ200 ade2-101uaa trp1-Δ63 lys2-80luag leu2-Δ1 KIN28::3HA::HIS3 med17::KanMX6 // med17-257 CEN TRP1</i>       | This work |
| <b>Y5547</b> | Kin28-HA<br><i>med17-326</i> | <i>MATa ura3-52 his3-Δ200 ade2-101uaa trp1-Δ63 lys2-80luag leu2-Δ1 KIN28::3HA::HIS3 med17::KanMX6 // med17-326 CEN TRP1</i>       | This work |
| <b>Y5548</b> | Kin28-HA<br><i>med17-444</i> | <i>MATa ura3-52 his3-Δ200 ade2-101uaa trp1-Δ63 lys2-80luag leu2-Δ1 KIN28::3HA::HIS3 med17::KanMX6 // med17-444 CEN TRP1</i>       | This work |
| <b>Y5549</b> | Kin28-HA<br><i>med17-546</i> | <i>MATa ura3-52 his3-Δ200 ade2-101uaa trp1-Δ63 lys2-80luag leu2-Δ1 KIN28::3HA::HIS3 med17::KanMX6 // med17-546 CEN TRP1</i>       | This work |
| <b>Y5550</b> | Kin28-HA<br><i>med17-670</i> | <i>MATa ura3-52 his3-Δ200 ade2-101uaa trp1-Δ63 lys2-80luag leu2-Δ1 KIN28::3HA::HIS3 med17::KanMX6 // med17-670 CEN TRP1</i>       | This work |
| <b>Y6066</b> | Kin28-HA<br><i>med17-504</i> | <i>MATa ura3-52 his3-Δ200 ade2-101uaa trp1-Δ63 lys2-80luag leu2-Δ1 KIN28::3HA::HIS3 med17::KanMX6 // med17-504 CEN TRP1</i>       | This work |
| <b>Y5552</b> | HA-TBP<br><i>med17-98</i>    | <i>MATa ura3-52 his3-Δ200 ade2-101uaa trp1-Δ63 lys2-80luag leu2-Δ1 LEU2::3HA::SPT15 med17::KanMX6 // med17-98 CEN TRP1</i>        | This work |
| <b>Y5601</b> | HA-TBP<br><i>med17-257</i>   | <i>MATa ura3-52 his3-Δ200 ade2-101uaa trp1-Δ63 lys2-80luag leu2-Δ1 LEU2::3HA::SPT15 med17::KanMX6 // med17-257 CEN TRP1</i>       | This work |
| <b>Y5553</b> | HA-TBP<br><i>med17-326</i>   | <i>MATa ura3-52 his3-Δ200 ade2-101uaa trp1-Δ63 lys2-80luag leu2-Δ1 LEU2::3HA::SPT15 med17::KanMX6 // med17-326 CEN TRP1</i>       | This work |
| <b>Y5554</b> | HA-TBP<br><i>med17-444</i>   | <i>MATa ura3-52 his3-Δ200 ade2-101uaa trp1-Δ63 lys2-80luag leu2-Δ1 LEU2::3HA::SPT15 med17::KanMX6 // med17-444 CEN TRP1</i>       | This work |
| <b>Y5555</b> | HA-TBP<br><i>med17-546</i>   | <i>MATa ura3-52 his3-Δ200 ade2-101uaa trp1-Δ63 lys2-80luag leu2-Δ1 LEU2::3HA::SPT15 med17::KanMX6 // med17-546 CEN TRP1</i>       | This work |
| <b>Y5556</b> | HA-TBP<br><i>med17-670</i>   | <i>MATa ura3-52 his3-Δ200 ade2-101uaa trp1-Δ63 lys2-80luag leu2-Δ1 LEU2::3HA::SPT15 med17::KanMX6 // med17-670 CEN TRP1</i>       | This work |
| <b>Y6064</b> | HA-TBP<br><i>med17-504</i>   | <i>MATa ura3-52 his3-Δ200 ade2-101uaa trp1-Δ63 lys2-80luag leu2-Δ1 LEU2::3HA::SPT15 med17::KanMX6 // med17-504 CEN TRP1</i>       | This work |
| <b>Y5563</b> | Rpb3-Myc<br>MED17            | <i>MATa ura3-52 his3- Δ200 ade2-101uaa trp1- Δ63 lys2-80luag leu2-Δ1 med17::KanMX6 RPB3::13Myc::HIS3MX // MED17 CEN URA3</i>      | This work |
| <b>Y5651</b> | Rpb3-Myc<br>MED17-<br>GFP    | <i>MATa ura3-52 his3- Δ200 ade2-101uaa trp1- Δ63 lys2-80luag leu2-Δ1 med17::KanMX6 RPB3::13Myc::HIS3MX // EGFP-MED17 CEN TRP1</i> | This work |
| <b>Y5739</b> | Rpb3-Myc                     | <i>MATa ura3-52 his3- Δ200 ade2-101uaa trp1- Δ63 lys2-80luag leu2-</i>                                                            | This work |

|              |                                                         |                                                                                                                                                           |           |
|--------------|---------------------------------------------------------|-----------------------------------------------------------------------------------------------------------------------------------------------------------|-----------|
|              | <i>med17-98-GFP</i>                                     | <i>Δ1 med17::KanMX6 RPB3::13Myc::HIS3MX // EGFP-med17-98 CEN TRP1</i>                                                                                     |           |
| <b>Y5652</b> | Rpb3-Myc<br><i>med17-257-GFP</i>                        | <i>MATa ura3-52 his3- Δ200 ade2-101uaa trp1- Δ63 lys2-80luag leu2- Δ1 med17::KanMX6 RPB3::13Myc::HIS3MX // EGFP-med17-257 CEN TRP1</i>                    | This work |
| <b>Y5740</b> | Rpb3-Myc<br><i>med17-326-GFP</i>                        | <i>MATa ura3-52 his3- Δ200 ade2-101uaa trp1- Δ63 lys2-80luag leu2- Δ1 med17::KanMX6 RPB3::13Myc::HIS3MX // EGFP-med17-326 CEN TRP1</i>                    | This work |
| <b>Y5741</b> | Rpb3-Myc<br><i>med17-444-GFP</i>                        | <i>MATa ura3-52 his3- Δ200 ade2-101uaa trp1- Δ63 lys2-80luag leu2- Δ1 med17::KanMX6 RPB3::13Myc::HIS3MX // EGFP-med17-444 CEN TRP1</i>                    | This work |
| <b>Y5742</b> | Rpb3-Myc<br><i>med17-546-GFP</i>                        | <i>MATa ura3-52 his3- Δ200 ade2-101uaa trp1- Δ63 lys2-80luag leu2- Δ1 med17::KanMX6 RPB3::13Myc::HIS3MX // EGFP-med17-546 CEN TRP1</i>                    | This work |
| <b>Y5743</b> | Rpb3-Myc<br><i>med17-670-GFP</i>                        | <i>MATa ura3-52 his3- Δ200 ade2-101uaa trp1- Δ63 lys2-80luag leu2- Δ1 med17::KanMX6 RPB3::13Myc::HIS3MX // EGFP-med17-670 CEN TRP1</i>                    | This work |
| <b>Y6341</b> | Rpb3-Myc<br><i>med17-504-GFP</i>                        | <i>MATa ura3-52 his3- Δ200 ade2-101uaa trp1- Δ63 lys2-80luag leu2- Δ1 med17::KanMX6 RPB3::13Myc::HIS3MX // EGFP-med17-504 CEN TRP1</i>                    | This work |
| <b>CA001</b> | Med22-10His-TEV-ProteinA<br>Med8-HA                     | <i>MATa leu2 trp1 ura3-52 prb1-1122 pep4-3 prc1-407 gal2 MED22 ::10His-TEV-ProteinA::KITRP1 MED8-PreSci-3HA::KanR</i>                                     | (5)       |
| <b>Y6704</b> | Med22-10His-TEV-ProteinA<br>Med8-HA<br><i>MED17</i>     | <i>MATa leu2 trp1 ura3-52 prb1-1122 pep4-3 prc1-407 gal2 MED22 ::10His-TEV-ProteinA::KITRP1 MED8-PreSci-3HA::KanR med17::natNT2 // MED17 LEU2 CEN</i>     | This work |
| <b>Y6705</b> | Med22-10His-TEV-ProteinA<br>Med8-HA<br><i>med17-98</i>  | <i>MATa leu2 trp1 ura3-52 prb1-1122 pep4-3 prc1-407 gal2 MED22 ::10His-TEV-ProteinA::KITRP1 MED8-PreSci-3HA::KanR med17::natNT2 // med17-98 LEU2 CEN</i>  | This work |
| <b>Y6706</b> | Med22-10His-TEV-ProteinA<br>Med8-HA<br><i>med17-444</i> | <i>MATa leu2 trp1 ura3-52 prb1-1122 pep4-3 prc1-407 gal2 MED22 ::10His-TEV-ProteinA::KITRP1 MED8-PreSci-3HA::KanR med17::natNT2 // med17-444 LEU2 CEN</i> | This work |
| <b>Y6707</b> | Med22-10His-TEV-ProteinA<br>Med8-HA<br><i>med17-504</i> | <i>MATa leu2 trp1 ura3-52 prb1-1122 pep4-3 prc1-407 gal2 MED22 ::10His-TEV-ProteinA::KITRP1 MED8-PreSci-3HA::KanR med17::natNT2 // med17-504 LEU2 CEN</i> | This work |
| <b>Y6708</b> | Med22-10His-TEV-ProteinA<br>Med8-HA<br><i>med17-670</i> | <i>MATa leu2 trp1 ura3-52 prb1-1122 pep4-3 prc1-407 gal2 MED22 ::10His-TEV-ProteinA::KITRP1 MED8-PreSci-3HA::KanR med17::natNT2 // med17-670 LEU2 CEN</i> | This work |

\* Plasmid descriptions are separated from chromosomal genotype by //.

**Table S2. Plasmids**

| <b>Name</b>              | <b>Genotype</b>                                                          | <b>Reference</b> |
|--------------------------|--------------------------------------------------------------------------|------------------|
| pVV208-MED17             | <i>Amp CEN URA3 MED17</i>                                                | (4)              |
| pVV204-MED17             | <i>Amp CEN TRP1 MED17</i>                                                | (4)              |
| pVV204-med17-8           | <i>Amp CEN TRP1 med17-E123G, L510P</i>                                   | This work        |
| pVV204-med17-68          | <i>Amp CEN TRP1 med17-P370S, L441P</i>                                   | (4)              |
| pVV204-med17-95          | <i>Amp CEN TRP1 med17-P104T, L510P</i>                                   | This work        |
| pVV204-med17-96          | <i>Amp CEN TRP1 med17-L674P</i>                                          | This work        |
| pVV204-med17-98          | <i>Amp CEN TRP1 med17-L86Q, E186G, E448Q</i>                             | This work        |
| pVV204-med17-140         | <i>Amp CEN TRP1 med17-M442L, Q444P</i>                                   | (4)              |
| pVV204-med17-157         | <i>Amp CEN TRP1 med17-R352K, C449F, K517R, N534Y, K618Q</i>              | This work        |
| pVV204-med17-158         | <i>Amp CEN TRP1 med17-F159Y, S226T, K280M, K377N, E438G, V465E</i>       | (4)              |
| pVV204-med17-187         | <i>Amp CEN TRP1 med17-N35S, K247E, L254I, K266R, N356D, E400G, L617P</i> | This work        |
| pVV204-med17-208         | <i>Amp CEN TRP1 med17-L441P, N611H, A655T, E669D</i>                     | (4)              |
| pVV204-med17-218         | <i>Amp CEN TRP1 med17-I397N, Y554F, L617P</i>                            | This work        |
| pVV204-med17-233         | <i>Amp CEN TRP1 med17-K387I, A450T, L674P</i>                            | (4)              |
| pVV204-med17-239         | <i>Amp CEN TRP1 med17-M207K, N276Y, L302S, R543C</i>                     | This work        |
| pVV204-med17-241         | <i>Amp CEN TRP1 med17-F295L, L546P</i>                                   | This work        |
| pVV204-med17-248         | <i>Amp CEN TRP1 med17-I393T, L469Q, I647N</i>                            | This work        |
| pVV204-med17-247         | <i>Amp CEN TRP1 med17-S230P, K433I, L508W</i>                            | This work        |
| pVV204-med17-249         | <i>Amp CEN TRP1 med17-L558P</i>                                          | This work        |
| pVV204-med17-257         | <i>Amp CEN TRP1 med17-L520S, I541K, E669G</i>                            | (4)              |
| pVV204-med17-299         | <i>Amp CEN TRP1 med17-N76I, I467T, D568Y</i>                             | This work        |
| pVV204-med17-326         | <i>Amp CEN TRP1 med17-F388L, L546P</i>                                   | This work        |
| pVV204-med17-327         | <i>Amp CEN TRP1 med17-M442V, V670E</i>                                   | (4)              |
| pVV204-med17-348         | <i>Amp CEN TRP1 med17- D498N, I545F, V670E</i>                           | This work        |
| pVV204-med17-370         | <i>Amp CEN TRP1 med17-P370S</i>                                          | This work        |
| pVV204-med17-396         | <i>Amp CEN TRP1 med17-S12G, I60V, S283G, Y348F, I476T, L609Q</i>         | This work        |
| pVV204-med17-404         | <i>Amp CEN TRP1 med17- I404V I429N E472V K517E</i>                       | This work        |
| pVV204-med17-444         | <i>Amp CEN TRP1 med17-Q444P</i>                                          | This work        |
| pVV204-med17-504         | <i>Amp CEN TRP1 med17-M504P</i>                                          | This work        |
| pVV204-med17-510         | <i>Amp CEN TRP1 med17-L510P</i>                                          | This work        |
| pVV204-med17-546         | <i>Amp CEN TRP1 med17-L546P</i>                                          | (4)              |
| pVV204-med17-670         | <i>Amp CEN TRP1 med17-V670E</i>                                          | This work        |
| pAG414GPD-EGFP-MED17     | <i>AmpR MED17 CEN TRP1</i>                                               | This work        |
| pAG414GPD-EGFP-med17-98  | <i>AmpR med17-98 CEN TRP1</i>                                            | This work        |
| pAG414GPD-EGFP-med17-444 | <i>AmpR med17-444 CEN TRP1</i>                                           | This work        |
| pAG414GPD-EGFP-med17-670 | <i>AmpR med17-670 CEN TRP1</i>                                           | This work        |
| pAG414GPD-EGFP-med17-504 | <i>AmpR med17-504 CEN TRP1</i>                                           | This work        |
| pAG415GPD-MED17          | <i>AmpR MED17 CEN LEU2</i>                                               | This work        |
| pAG415GPD-med17-98       | <i>AmpR med17-98 CEN LEU2</i>                                            | This work        |
| pAG415GPD-med17-444      | <i>AmpR med17-444 CEN LEU2</i>                                           | This work        |
| pAG415GPD-med17-670      | <i>AmpR med17-670 CEN LEU2</i>                                           | This work        |
| pAG415GPD-med17-504      | <i>AmpR med17-504 CEN LEU2</i>                                           | This work        |

**Table S3. Oligonucleotides**

| Name      | Forward                                | Reverse                  |
|-----------|----------------------------------------|--------------------------|
| ATP1-O    | TCTTGCAGTCGGTGATGGTA                   | TATCGGAACCGAAAAGAACG     |
| ALD6-P    | AGCCGACAAAAGAAAAACGA                   | CGTTCCCAAGAGGAGATCAA     |
| ALD6-O    | CCCATTTGGTCTTTGACGAT                   | GCCTTGAAAGCAGCCAATAG     |
| SRM1-P    | GGCAAGGCAGGATGAATAAA                   | ATTGGTGGCGACTGTTCTTT     |
| PHO84-P   | CCTCATCTCTTGATAAAGTAAAGTAAAGTTCTAAGTTC | TTGTGTGCCCTGGTGATCTACG   |
| PHO84-O   | TTGGGTTGGGTACCGTTCTA                   | TTCCGCATCTTGTCTTGTG      |
| QCR6-O    | GATGACGATAACGAGCAGCA                   | TACCCTCCTCCGTGTTCTTG     |
| PIL1-O    | GATTCTTTGGGAAGGGTGGT                   | ATCGTCATCGTTTTCCAACC     |
| MGR1-P    | TGCATGGCATCGTCTTTTAC                   | GTATGGTCGGTGGAATTGCT     |
| RPA34-P   | CATCAGGGCCAATCAATTCT                   | TTTCGACTTCAGCATTGCAC     |
| PSA1-P    | CTGCACCCGATCCTTCTTAC                   | TTCTGTTTTCGCGTTCCTCA     |
| ALD6-P    | ATGCGATATAGCACCGACCA                   | CTTGACCTCGAACGGTGTTT     |
| ACT1-P    | TCCACGTCCTCTTGATAAAA                   | GGTTTGAGTAGAAAAGGGGAAGG  |
| APA1-P    | GAGCGGCCTGAAATACTGTC                   | AACGTTCCGAAACAGGACAC     |
| PIM1-P    | GCCACCGGAAGGAAATAAGT                   | GTTCAAGCACCTCGAAAACC     |
| STI1-P    | CCAAAAGTCTGCTCCCAAAT                   | TGCAGCGTTACCTTGTTGTT     |
| YIP5-P    | CAACGTCCTACGCTCAAGGT                   | CCCTCGAGATCATCGTCAAT     |
| PSA1-P1   | CTGCACCCGATCCTTCTTAC                   | TTCTGTTTTCGCGTTCCTCA     |
| PSA1-P2   | GGAGCCACCACGTTTATTTT                   | GTTTACAAGAGCGCCACGAG     |
| PRB1-P    | CCGGGTTAGCAGAGTAGCAG                   | CTCTTATCGCGGGTGTGTT      |
| ARG3-P    | GTGAATTTTCGAGGGTCACG                   | AAAATTTGTCCGGGCATTTT     |
| FLC1-P    | GCGGAGAGGAGGAGAGAGAC                   | CGTAGGAAAACGCATGTGGTA    |
| HSP42-P   | GGGAGGCCTCTGTGAAGTTA                   | GCCTGAACGTGTCCCTATGT     |
| HSP42-O   | CACCTGGTAACGCAAGAACA                   | CATCGTTCGCTCACCTACAA     |
| HSP30-P1  | ATCCCAGTCCCGACTCTTAT                   | GGCCAATTAGGGAGAGGAAA     |
| HSP30-P2  | ATTTTGTGGCCATTTTCCA                    | CGGGATATGGCTTTGCTTAC     |
| HSP30-O   | CAAGGTGTGATATGCCAACG                   | ATAGCCTCACCGTCTGGTTG     |
| HSP150-P1 | GGAACACTTGAAGTCTAACGACA                | AAGCAGAGGCAACCAAAGTC     |
| HSP150-P2 | ATTATCCTGGCCGCTAATCC                   | GTGGCAAAGCAGTGAGATTG     |
| HSP150-O  | CCGTTCAACCAATCTCCACT                   | GGCAGCGGTACTCTTGGTAG     |
| HSP104-P1 | CCCATCTCAAAGAACTGCAA                   | GGAACAAGTGACAAAGGAACG    |
| HSP104-O  | GGTACCACGCGAGGTTATGT                   | CCGTCATCCAACATTTGTAGC    |
| HSP12-O   | CAAGGGTGTCTTCCAAGGTG                   | CGACCGGAAACATATTCGAC     |
| ADH1-P1   | ATAGGCGCATGCAACTTCTT                   | CATCAGCTCTGGAACAACGA     |
| ADH1-P2   | TTCCTTCATTCACGCACACT                   | AGGGAACGAGAACAATGACG     |
| ADH1-O    | GGGTATTGACGGTGGTGAAG                   | AAACGTTGATGACACCGTGA     |
| PYK1-P1   | CGCACCGTCACAAAGTGTT                    | TGGGAAGGAAAGGAAATCAC     |
| PYK1-P2   | CCTTTCTTCCCATATGATGC                   | ACTTTGAAAGGGGACCATGA     |
| PYK1-O    | TGCTTTGAGAAAGGCTGGTT                   | TCTGATTTCTGGACCCTTGG     |
| PYK1-ATG  | GGTCCCCTTTCAAAGTTATTCTCTA              | CTTGAGAAGAACCTCCATCATTG  |
| PMA1-O    | GGTTTTGGTCATTGCCACTT                   | ACGGCCATAGTGGTGTAAC      |
| PMA1-P1   | AACAAACCCGGTCTCGAAG                    | GAAGTGCCGCATTAGGAAAT     |
| PMA1-P2   | GATGGTGGGTACCGCTTATG                   | TTGGTGTTATAGGAAAGAAAGAG  |
| GAL1-P    | ACGCTTAACTGCTCATTGCT                   | TGTTCCGGAGCAGTGCGGCGC    |
| GAL1-O1   | AAAGAACTTGCACCGGAAA                    | GGCCCATATTCGCTTTAACA     |
| GAL1-O2   | ACATTTCCACACCCTGGAAC                   | TTCTTCGCGAGAACAATTCA     |
| rDNA-25S  | GGTTATATGCCGCCCGTCTTGA                 | CCCAACAGCTATGCTCTTACTC   |
| rDNA-18S  | GGTCTGTGATGCCCTTAGACG                  | AGTTTCACAAGATTACCAAGACC  |
| SCR1      | GTCTGGGCAGAGCTGTCT                     | AAGGTGGAGCCCCTAAGGA      |
| RPN2      | GCGGATACAGGCACATTGGATACC               | TGTTGCTACCTTCTACCTCCTT   |
| TAF10     | ATATTCCAGGATCAGGTCTCCGTAGC             | GTAGTCTTCTCATTCTGTTGATGT |
| PMA1-O2   | TCTCCAAAGCCCGTTAAATG                   | CCGTTTCATAGCACCGAAGTT    |



**Table S4. Total number of mapped reads for ChIP-seq experiments**

| <b>Sample</b>                  | <b>Million of mapped reads</b> |
|--------------------------------|--------------------------------|
| INPUT-MED17                    | 2.9                            |
| INPUT-med17-98                 | 3.0                            |
| INPUT-med17-444                | 4.0                            |
| INPUT-med17-670                | 3.5                            |
| POL2-MED17                     | 7.9                            |
| POL2- med17-98                 | 8.7                            |
| POL2- med17-444                | 10.4                           |
| POL2- med17-670                | 7.8                            |
| TBP-WT                         | 2.8                            |
| TBP- med17-98                  | 2.8                            |
| TBP- med17-444                 | 3.2                            |
| TBP- med17-670                 | 3.6                            |
| RAD3-WT (core TFIIH)           | 5.0                            |
| RAD3- med17-98                 | 3.4                            |
| RAD3- med17-444                | 11.3                           |
| RAD3- med17-670                | 3.9                            |
| KIN28-WT (TFIIH kinase module) | 2.9                            |
| KIN28- med17-98                | 3.0                            |
| KIN28- med17-444               | 4.0                            |
| KIN28- med17-670               | 3.5                            |
| MED15-WT (Mediator)            | 3.5                            |
| MED15- med17-98                | 9.2                            |
| MED15- med17-444               | 3.0                            |
| MED15- med17-670               | 3.7                            |
| INPUT- med17-504               | 15.2                           |
| POL2-WT                        | 18.7                           |
| POL2- med17-504                | 16.2                           |
| TBP-WT                         | 9.9                            |
| TBP- med17-504                 | 11.7                           |
| RAD3-WT                        | 10.6                           |
| RAD3- med17-504                | 8.0                            |
| KIN28-WT                       | 5.0                            |
| KIN28- med17-504               | 3.2                            |
| MED15-WT                       | 6.3                            |
| MED15- med17-504               | 3.5                            |
| NT-WT                          | 1.7                            |

**Table S5. Values used to normalize the ChIPseq data from untagged strain sample before subtraction**

| <b>Sample</b>                  | <b>Normalization value for untagged strain sample</b> |
|--------------------------------|-------------------------------------------------------|
| TBP-WT                         | 0.60                                                  |
| TBP- med17-98                  | 0.53                                                  |
| TBP- med17-444                 | 0.20                                                  |
| TBP- med17-670                 | 0.86                                                  |
| RAD3-WT (core TFIIH)           | 0.57                                                  |
| RAD3- med17-98                 | 0.38                                                  |
| RAD3- med17-444                | 2.69                                                  |
| RAD3- med17-670                | 0.25                                                  |
| KIN28-WT (TFIIH kinase module) | 0.70                                                  |
| KIN28- med17-98                | 0.80                                                  |
| KIN28- med17-444               | 0.20                                                  |
| KIN28- med17-670               | 0.62                                                  |
| MED15-WT (Mediator)            | 2.10                                                  |
| MED15- med17-98                | 1.43                                                  |
| MED15- med17-444               | 0.77                                                  |
| MED15- med17-670               | 1.65                                                  |
| TBP-WT-2                       | 2.45                                                  |
| TBP- med17-504                 | 1.45                                                  |
| RAD3-WT-2                      | 2.04                                                  |
| RAD3- med17-504                | 2.04                                                  |
| KIN28-WT-2                     | 2.46                                                  |
| KIN28- med17-504               | 1.42                                                  |
| MED15-WT-2                     | 4.94                                                  |
| MED15- med17-504               | 3.53                                                  |

**Table S6. Regions used for ChIP-seq data normalization**

| <b>Protein</b>     | <b>Regions</b>                                                                                                                               |
|--------------------|----------------------------------------------------------------------------------------------------------------------------------------------|
| <b>Pol II</b>      | ADH1-O, ATP1-O, GAL1-O2, HSP104-O, HSP12-O, HSP150-O, HSP30-O, HSP42-O, PMA1-O, PYK1-O, PHO84-O, QCR6-O, PIL1-O                              |
| <b>Kin28, Rad3</b> | ADH1-P2, GAL1-O2, HSP104-P1, HSP30-P1, HSP42-P, MGR1-P, PMA1-P2, PYK1-P2, RPA34-P, SRM1-P, PSA1-P2, ALD6-P, PHO84-P, PSA1-P2, ACT1-P, APA1-P |
| <b>TBP</b>         | ADH1-P2, GAL1-O2, HSP104-P1, HSP12-P1, HSP150-P1, HSP42-P, PIM1-P, PMA1-P2, PYK1-P2, STI1-P, YIP5-P, PSA1-P2                                 |
| <b>Med15</b>       | ADH1-P1, ARG3-P1, FLC1-P, GAL1-O1, PMA1-P1, PYK1-P1, HSP42-P, HSP150-P2, HSP30-P2, PSA1-P1                                                   |

**Table S7. Normalization coefficients for ChIP-seq data**

| <b>Protein</b> | <b>Mutant</b>   |                  |                  |                  |
|----------------|-----------------|------------------|------------------|------------------|
|                | <i>med17-98</i> | <i>med17-444</i> | <i>med17-670</i> | <i>med17-504</i> |
| <b>Pol II</b>  | 0.83            | 0.38             | 0.70             | 0.88             |
| <b>Kin28</b>   | 1.26            | 0.28             | 0.88             | 1.42             |
| <b>Rad3</b>    | 1.25            | 0.85             | 0.59             | 1.09             |
| <b>TBP</b>     | 1.24            | 0.62             | 0.89             | 0.82             |
| <b>Med15</b>   | 0.31            | 0.72             | 0.73             | 1.96             |

**Table S8. *med17* mutations and their phenotypes**

| Name                           | Mutations                                | Phenotype <sup>1</sup> |
|--------------------------------|------------------------------------------|------------------------|
| <b>Single mutations</b>        |                                          |                        |
| <i>med17-96</i>                | L674P                                    | N 30 / S 37            |
| <i>med17-249</i>               | L558P                                    | S 30 / S 37            |
| <i>med17-370</i> <sup>*2</sup> | P370S                                    | N 30 / S 37            |
| <i>med17-444</i> <sup>*</sup>  | Q444P                                    | S 30 / L 37            |
| <i>med17-504</i> <sup>*</sup>  | M504P                                    | S 30 / L 37            |
| <i>med17-510</i> <sup>*</sup>  | L510P                                    | S 30 / L 37            |
| <i>med17-546</i> <sup>*</sup>  | L546P                                    | S 30 / S 37            |
| <i>med17-670</i> <sup>*</sup>  | V670E                                    | S 30 / S 37            |
| <b>Double mutations</b>        |                                          |                        |
| <i>med17-8</i>                 | E123G L510P                              | N 30 / L 37            |
| <i>med17-68</i>                | P370S L441P                              | S 30 / L 37            |
| <i>med17-95</i>                | P104T L510P                              | S 30 / L 37            |
| <i>med17-140</i>               | M442L Q444P                              | S 30 / L 37            |
| <i>med17-241</i>               | F295L L546P                              | N 30 / S 37            |
| <i>med17-326</i>               | F388L L546P                              | N 30 / S 37            |
| <i>med17-327</i>               | M442V V670E                              | S 30 / L 37            |
| <b>Triple mutations</b>        |                                          |                        |
| <i>med17-98</i>                | L86Q E186G E448Q                         | N 30 / S 37            |
| <i>med17-218</i>               | I397N Y554F L617P                        | N 30 / L 37            |
| <i>med17-247</i>               | S230P K433I L508W                        | N 30 / S 37            |
| <i>med17-233</i>               | K387I A450T L674P                        | S 30 / L 37            |
| <i>med17-257</i>               | L520S I541K E669G                        | S 30 / L 37            |
| <i>med17-248</i>               | I393T L469Q I647N                        | N 30 / S 37            |
| <i>med17-299</i>               | N76I I467T D568Y                         | S 30 / S 37            |
| <i>med17-348</i>               | D498N I545F V670E                        | S 30 / L 37            |
| <b>Multiple mutations</b>      |                                          |                        |
| <i>med17-157</i>               | R352K C449F K517R N534Y K618Q            | N 30 / L 37            |
| <i>med17-158</i>               | F159Y S226T K280M K377N E438G V465E      | S 30 / L 37            |
| <i>med17-187</i>               | N35S K247E L254I K266R N356D E400G L617P | N 30 / S 37            |
| <i>med17-208</i>               | L441P N611H A655T E669D                  | S 30 / L 37            |
| <i>med17-239</i>               | M207K N276Y L302S R543C                  | N 30 / L 37            |
| <i>med17-396</i>               | S12G I60V S283G Y348F I476T L609Q        | N 30 / L 37            |
| <i>med17-404</i>               | I404V I429N E472V K517E                  | N 30 / L 37            |

<sup>1</sup> Normal (N), slow growth (S) and lethal (L) phenotypes at 30°C (30) or 37°C (37) are indicated.

<sup>2</sup> Mutations obtained by site-directed mutagenesis are indicated by asterisk. The four mutants chosen for a detailed analysis are shown in red.

**Table S9. Mediator integrity in *med17* mutants<sup>1</sup>**

| Mutant           | Head    |         |         |         |         | Tail    | Middle/Tail |         |         | Tail    |
|------------------|---------|---------|---------|---------|---------|---------|-------------|---------|---------|---------|
| Co-IP            | Med6    | Med20   | Med8-HA |         |         | Med5-HA | Med14       |         |         | Med2-HA |
| IP               | Med8-HA | Med5-HA | Med8-HA | Med2-HA | Med8-HA | Med5-HA | Med5-HA     | Med2-HA | Med8-HA | Med2-HA |
| <i>med17-8</i>   | +       | +       | +       | +       | +       | +       | +           | +       | +/-     | +       |
| <i>med17-68</i>  |         | +/-     |         | +       | +       | +/-     | +           | ++      |         | +       |
| <i>med17-95</i>  | +       | -       | +       | +       | +       | +       | +           | +       | +       | +       |
| <i>med17-96</i>  | +       | +/-     | +/-     | +       | +       | +       | +           | +       | +       | +       |
| <i>med17-98</i>  | +       | +       | +       | +       | +       | +       | +           | +       | ++      | +       |
| <i>med17-140</i> | +/-     | +/-     | +       | +       | +/-     | +       | +           | +       | +       | +       |
| <i>med17-157</i> | +/-     | +/-     | +       | +       | +       | +       | +           | +       | +       | +       |
| <i>med17-158</i> | ++      | +/-     | +       | +       | +       | +/-     | +           | ++      | ++      | +       |
| <i>med17-187</i> | +       | +       | +       | +       | +       | +       | +           | ++      | +       | +       |
| <i>med17-208</i> |         | +       |         | +       | +       | +       | +           | +       |         | +       |
| <i>med17-218</i> | +       | +/-     | +       | +       | +       | +/-     | +           | +       | +       | +       |
| <i>med17-233</i> | +/-     | +/-     | +       | +       | +       | +/-     | +/-         | +/-     | +/-     | +/-     |
| <i>med17-239</i> | +/-     | +/-     | +       | +       | +/-     | +       | +           | +/-     | +       | +/-     |
| <i>med17-241</i> | +/-     | +/-     | +/-     | +/-     | +/-     | +       | +           | +       | +       | +       |
| <i>med17-247</i> | +       | +/-     | +/-     | +       | +       | +       | +           | +       | ++      | +       |
| <i>med17-248</i> | +       | +/-     | +       | +       | +       | +/-     | +           | +       | ++      | +       |
| <i>med17-249</i> | +       | +/-     | +       | +       | +       | +       | +           | +/-     | +       | +       |
| <i>med17-257</i> | -       | +/-     | +/-     | +       | +/-     | +       | +           | +/-     | +/-     | +       |
| <i>med17-299</i> | +/-     | +       | +/-     | +       | +/-     | +       | +           | +/-     | +       | +       |
| <i>med17-326</i> | +       | +/-     | +       | +       | +       | +       | +           | +       | ++      | +       |
| <i>med17-327</i> | -       | +/-     | +/-     | +       | +/-     | +       | +           | +/-     | +       | +       |
| <i>med17-348</i> | -       | -       | +/-     | +/-     | +/-     | +       | +           | +/-     | +       | +       |
| <i>med17-370</i> | ++      | +       | +       | +       | ++      | +       | +           | +       | +       | +       |
| <i>med17-396</i> | +       | +/-     | +       | +       | +       | +       | +           | +       | +       | +       |
| <i>med17-404</i> | +/-     | +/-     | +       | +       | +       | +/-     | +           | +       | +       | +       |
| <i>med17-444</i> | +       | +/-     | +       | +       | +       | +       | +           | +       | +       | +       |
| <i>med17-510</i> | +       | +       | +       | +       | +       | +       | +           | +       | +       | +       |
| <i>med17-546</i> | +       | +/-     | +       | +       | +       | +       | +           | +       | +       | +       |
| <i>med17-670</i> | +       | +/-     | +       | +       | ++      | +       | +           | +/-     | +       | +       |

<sup>1</sup> Yeast strains carrying a HA-tag on Med8, Med5 or Med2 Mediator subunits were used for CoIP experiments. Med6, Med20, Med8-HA, Med5-HA, Med14 and Med2-HA subunits were detected by western blotting with corresponding antibodies. Levels of western blotting signals compared to the control IP with a wild-type strain are indicated as follows: similar (+), slightly decreased (+/-), decreased (-) and slightly increased (++) levels. It should be noted that lower IP signals could explain lower CoIP signals.

## Supplementary figure legends

### Figure S1. Growth phenotypes of *med17* mutants.

Cultures of wild-type (WT) and mutant *med17* yeast strains were serially diluted, spotted on YPD agar plates and incubated for 3 days at permissive (30°C) or non-permissive (37°C) temperature. *med17* mutants selected for a detailed analysis are indicated in red.

### Figure S2. Schematic representation of the localization of selected Med17 mutations.

(A) Multiple alignment of the Med17 conserved domain 11 (signature specific motif, SSM#11) from *Homo sapiens sapiens* (Hs), *Mus musculus* (Mm), *Gallus gallus* (Gg), *Xenopus tropicalis* (Xt), *Danio rerio* (Dr), *Tetraodon nigroviridis* (Tn), *Ciona savignyi* (Cs), *Drosophila melanogaster* (Dm), *Drosophila pseudoobscura* (Dp), *Anopheles gambiae* (Ag), *Apis mellifera* (Am), *Bombyx mori* (Bo), *Tribolium castaneum* (Tc), *Caenorhabditis elegans* (Ce), *Caenorhabditis briggsae* (Cb), *Brugia malayi* (Bm), *Schistosoma mansoni* (Sm), *Rhizopus oryzae* (Ro), *Cryptococcus neoformans JEC21* (Cn), *Ustilago maydis* (Um), *Coprinus cinereus/Coprinopsis cinerea* (Cc), *Phanerochaete chrysosporium* (Pc), *Neurospora crassa* (Nc), *Magnaporthe grisea* (Mg), *Gibberella zeae/Fusarium graminearum* (Gz), *Aspergillus nidulans* (An), *Aspergillus fumigatus* (Af), *Coccidioides posadasii* (Co), *Schizosaccharomyces pombe* (Sp), *Yarrowia lipolytica* (Yl), *Candida albicans* (Ca), *Debaryomyces hansenii* (Dh), *Kluyveromyces lactis* (Kl), *Kluyveromyces waltii* (Kw), *Eremothecium gossypii* (Eg), *Candida grabata* (Cg) and *Saccharomyces cerevisiae* (Sc) was modified from (9). The consensus SSM generated by WebLogo is shown above the alignment. Location of L371P mutation in human Med17 and M504P mutation in yeast *S. cerevisiae* Med17 is indicated with red dotted line.

(B) Location of Med17 mutations is indicated for selected mutants: *med17-98* (L86Q, E186G, E448Q) in blue, *med17-444* (Q444P) in orange, *med17-504* (M504P) in green, *med17-670*

(V670E) in red.

The grey boxes indicate the positions of the conserved domains (signature specific motifs, SSMs) (9). The location of conserved regions #12 and #13 is not indicated on Figure since it is less obvious and depends on the number of sequences in alignments.

(C) Location of sites of *med17* (red spheres) mutations is indicated on the model of *S. cerevisiae* Mediator head module from Larivière et al. (10) for *med17-98*, -444, -504 and -670 when the corresponding residues are present on the model. The residues L86 and E186 mutated in *med17-98* are absent in the model. Mediator subunits are indicated in different colours.

### **Figure S3. Mediator integrity in *med17* mutants.**

(A) Wild-type (WT and WT Med5-3HA) strains and *med17* mutant strains carrying a Med5-HA tag were grown to exponential phase at 30°C or transferred to 37°C for 45 min. The presence of a Med5-HA tag is indicated by a line above the western blots. Mediator was immunoprecipitated (IP) through Med5-HA from crude extracts (Input) of wild-type and mutant strains using magnetic beads coupled to anti-HA antibodies. *MED17* strain carrying non-tagged Mediator subunit was used as a negative control. Coimmunoprecipitated Mediator subunits were detected by western blotting using anti-Med14 and -Med17 antibodies.

(B) The presence of Med21 subunit in purified Mediator complex from *med17-98* mutant compared to the WT strain was confirmed by western blotting using anti-Med21 antibody.

### **Figure S4. Interaction between Pol II and Mediator in *med17* mutants.**

Interaction between Pol II and Mediator in *med17-98*, 444 and 670 mutants compared to the WT strain is shown. Rpb3-Myc Med17-EGFP strains with WT *MED17* or *med17* mutations were grown at 30°C in YPD medium and cross-linked or not with formaldehyde (FA), as

indicated. Med17-EGFP was immunoprecipitated (IP) with anti-EGFP antibody from crude extracts (Input) and analysed by western blotting with anti-Myc antibody (CoIP) against Rpb3. The cross-linked Rpb3-Med17 band is indicated in red. The position of unidentified cross-linked proteins with the tagged Med17 or Rpb3 subunits is indicated by a vertical bar.

**Figure S5. *med17* mutations influence mRNA abundance after a shift at 37°C.**

Yeast strains were grown at 30°C in YPD medium and then shifted for the indicated time at 37°C. mRNA levels were determined by quantitative RT-PCR. qPCR results were normalized to the WT signal. *25S*, *18S rRNA* and *SCR1* genes were used as internal controls for normalization.

**Figure S6. Conservation of Med17 Mediator subunit from yeast *S. cerevisiae* to human.**

Alignment of Med17 Mediator subunit from yeast *S. cerevisiae* (Sc) and human (Hs) was modified from (9). Signature specific motifs (SSMs) are indicated (9). Localization of Med17 mutations is indicated for mutants characterized in this study: *med17-98* (L86Q, E186G, E448Q), *med17-444* (Q444P), *med17-504* (M504P), *med17-670* (V670E).

**Supplementary references**

1. Van Mullem, V., Wery, M., De Bolle, X. and Vandenhoute, J. (2003) Construction of a set of *Saccharomyces cerevisiae* vectors designed for recombinational cloning. *Yeast*, **20**, 739-746.
2. Alberti, S., Gitler, A.D. and Lindquist, S. (2007) A suite of Gateway cloning vectors for high-throughput genetic analysis in *Saccharomyces cerevisiae*. *Yeast*, **24**, 913-919.
3. Longtine, M.S., McKenzie, A., 3rd, Demarini, D.J., Shah, N.G., Wach, A., Brachat, A., Philippsen, P. and Pringle, J.R. (1998) Additional modules for versatile and economical PCR-based gene deletion and modification in *Saccharomyces cerevisiae*. *Yeast*, **14**, 953-961.
4. Soutourina, J., Wydau, S., Ambroise, Y., Boschiero, C. and Werner, M. (2011) Direct interaction of RNA polymerase II and mediator required for transcription in vivo. *Science*, **331**, 1451-1454.
5. Cai, G., Imasaki, T., Takagi, Y. and Asturias, F.J. (2009) Mediator structural conservation and implications for the regulation mechanism. *Structure*, **17**, 559-567.



6. Janke, C., Magiera, M.M., Rathfelder, N., Taxis, C., Reber, S., Maekawa, H., Moreno-Borchart, A., Doenges, G., Schwob, E., Schiebel, E. *et al.* (2004) A versatile toolbox for PCR-based tagging of yeast genes: new fluorescent proteins, more markers and promoter substitution cassettes. *Yeast (Chichester, England)*, **21**, 947-962.
7. Sikorski, R.S. and Hieter, P. (1989) A system of shuttle vectors and yeast host strains designed for efficient manipulation of DNA in *Saccharomyces cerevisiae*. *Genetics*, **122**, 19-27.
8. Eyboulet, F., Cibot, C., Eychenne, T., Neil, H., Alibert, O., Werner, M. and Soutourina, J. (2013) Mediator links transcription and DNA repair by facilitating Rad2/XPG recruitment. *Genes Dev*, **27**, 2549-2562.
9. Bourbon, H.M. (2008) Comparative genomics supports a deep evolutionary origin for the large, four-module transcriptional mediator complex. *Nucleic Acids Res*, **36**, 3993-4008.
10. Lariviere, L., Plaschka, C., Seizl, M., Wenzek, L., Kurth, F. and Cramer, P. (2012) Structure of the Mediator head module. *Nature*, **492**, 448-451.

Figure S1

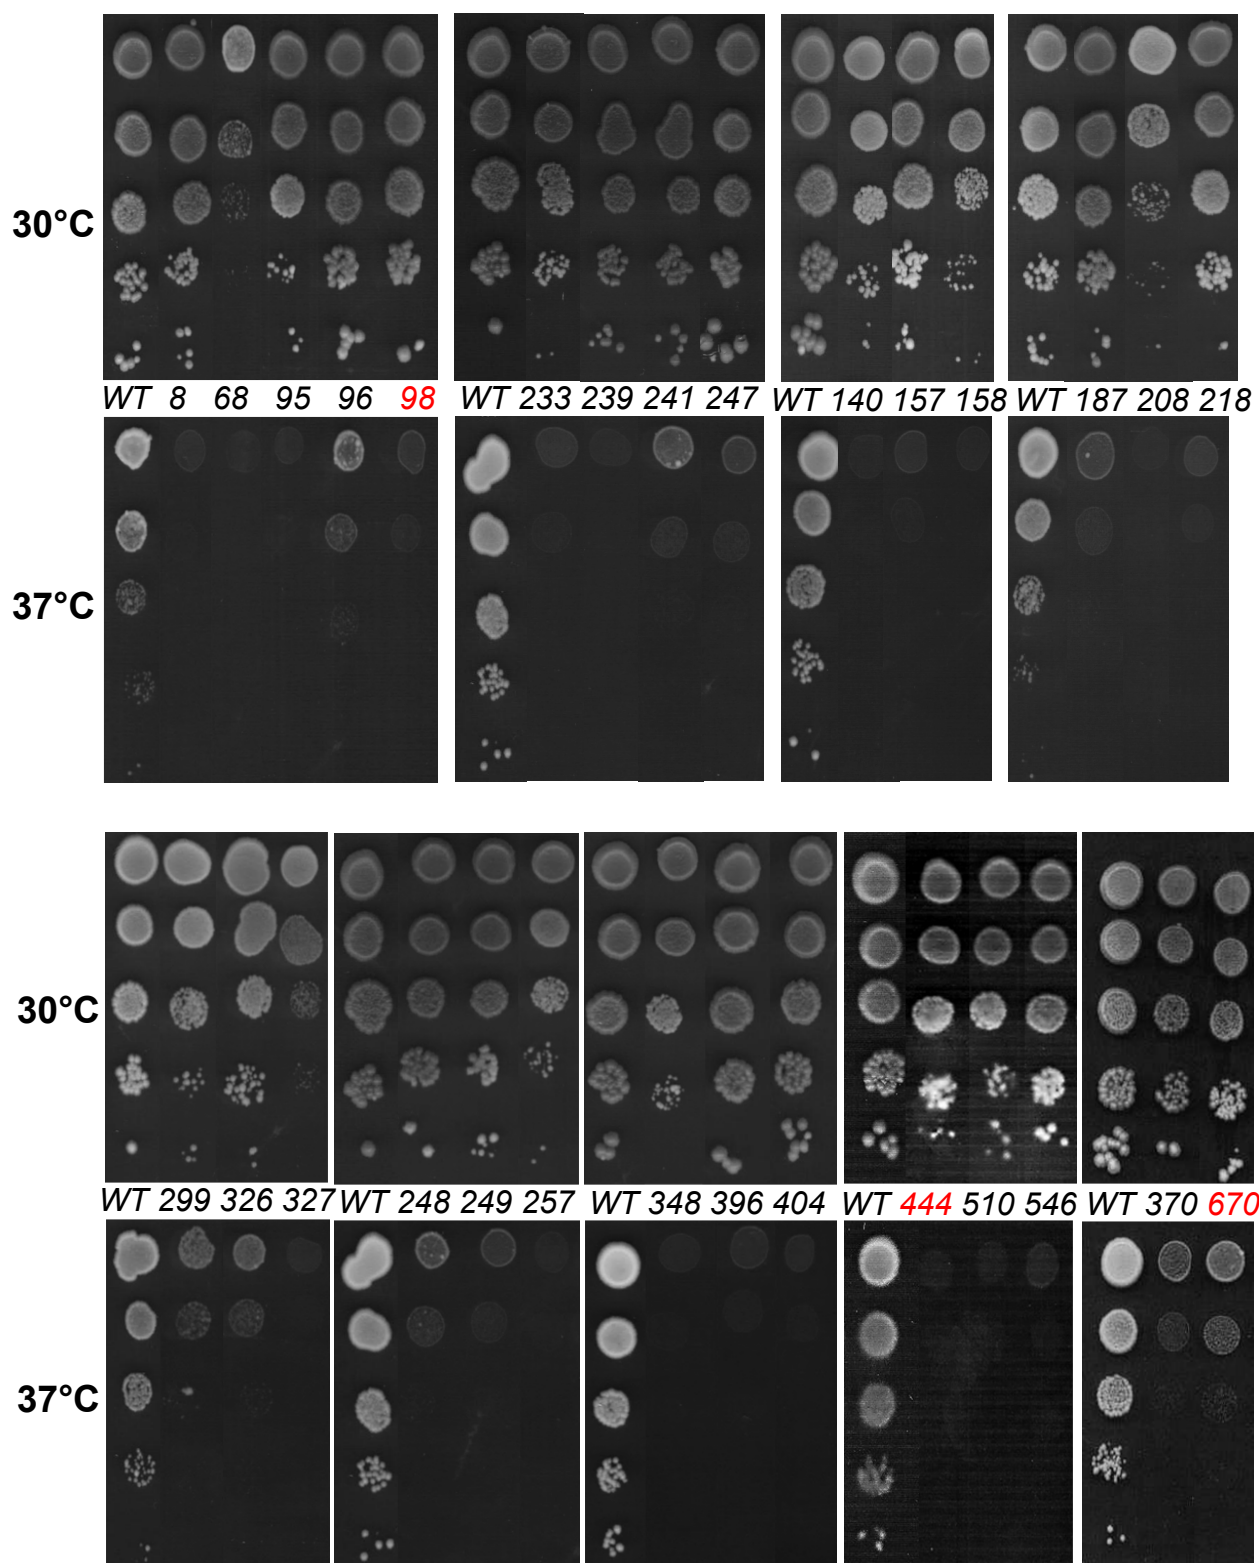

**A**

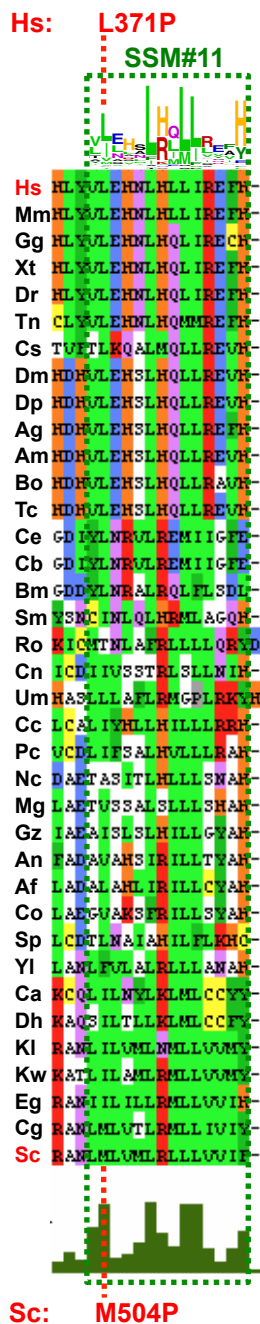

**B**

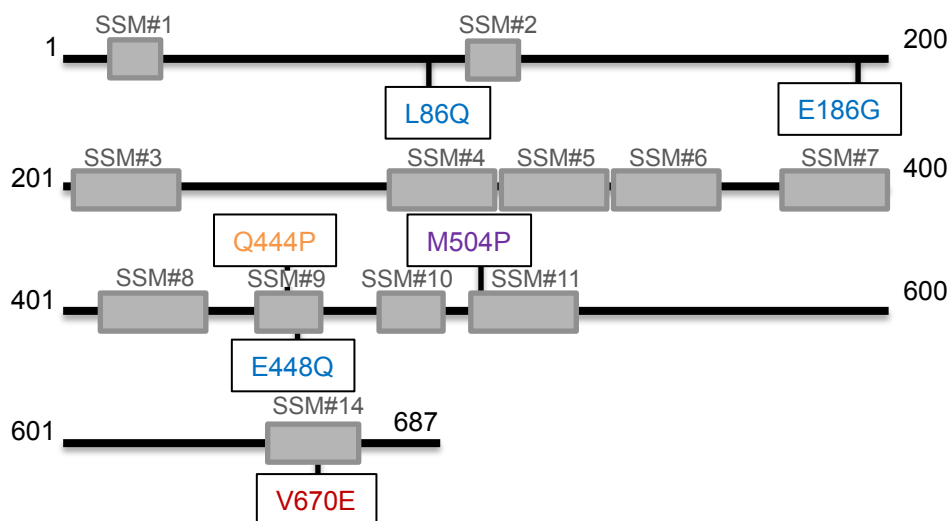

**C**

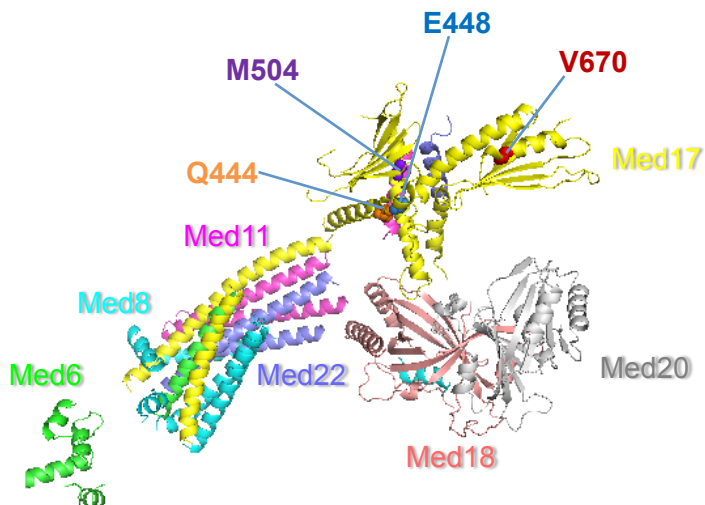

Figure S3

**A**

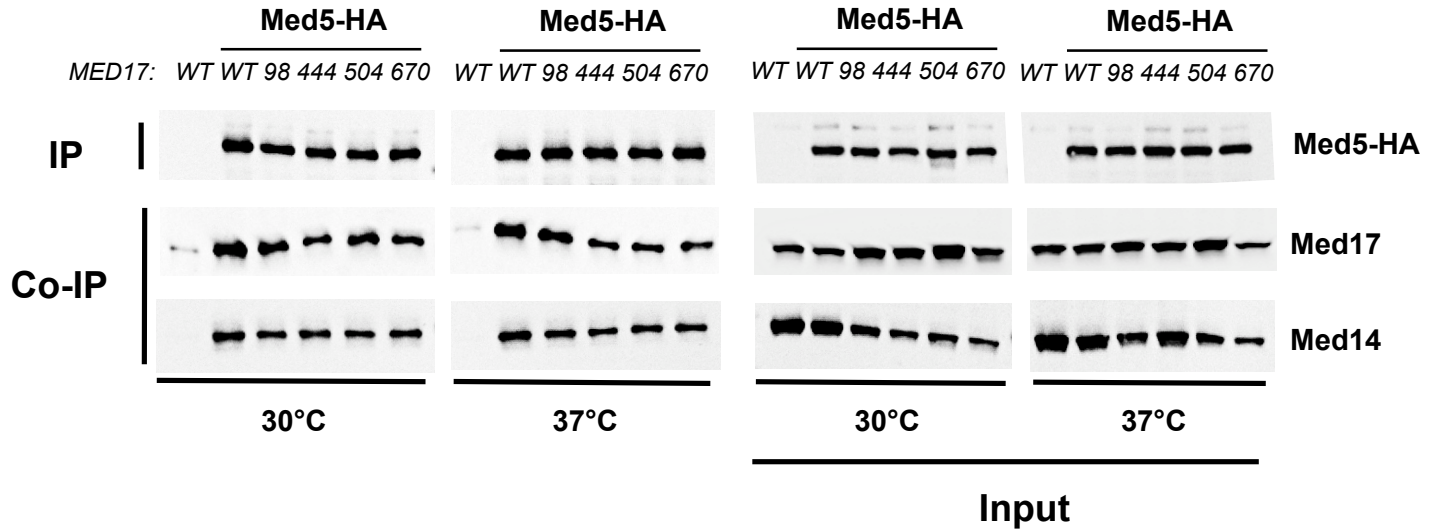

**B**

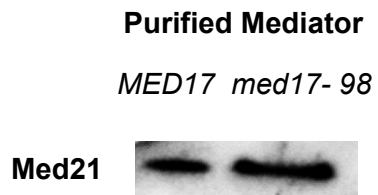

Figure S4

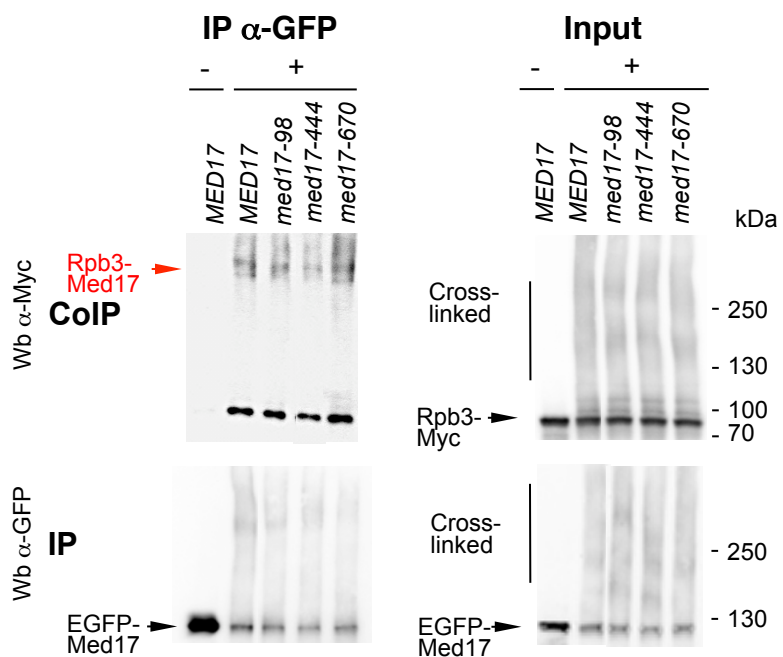

Figure S5

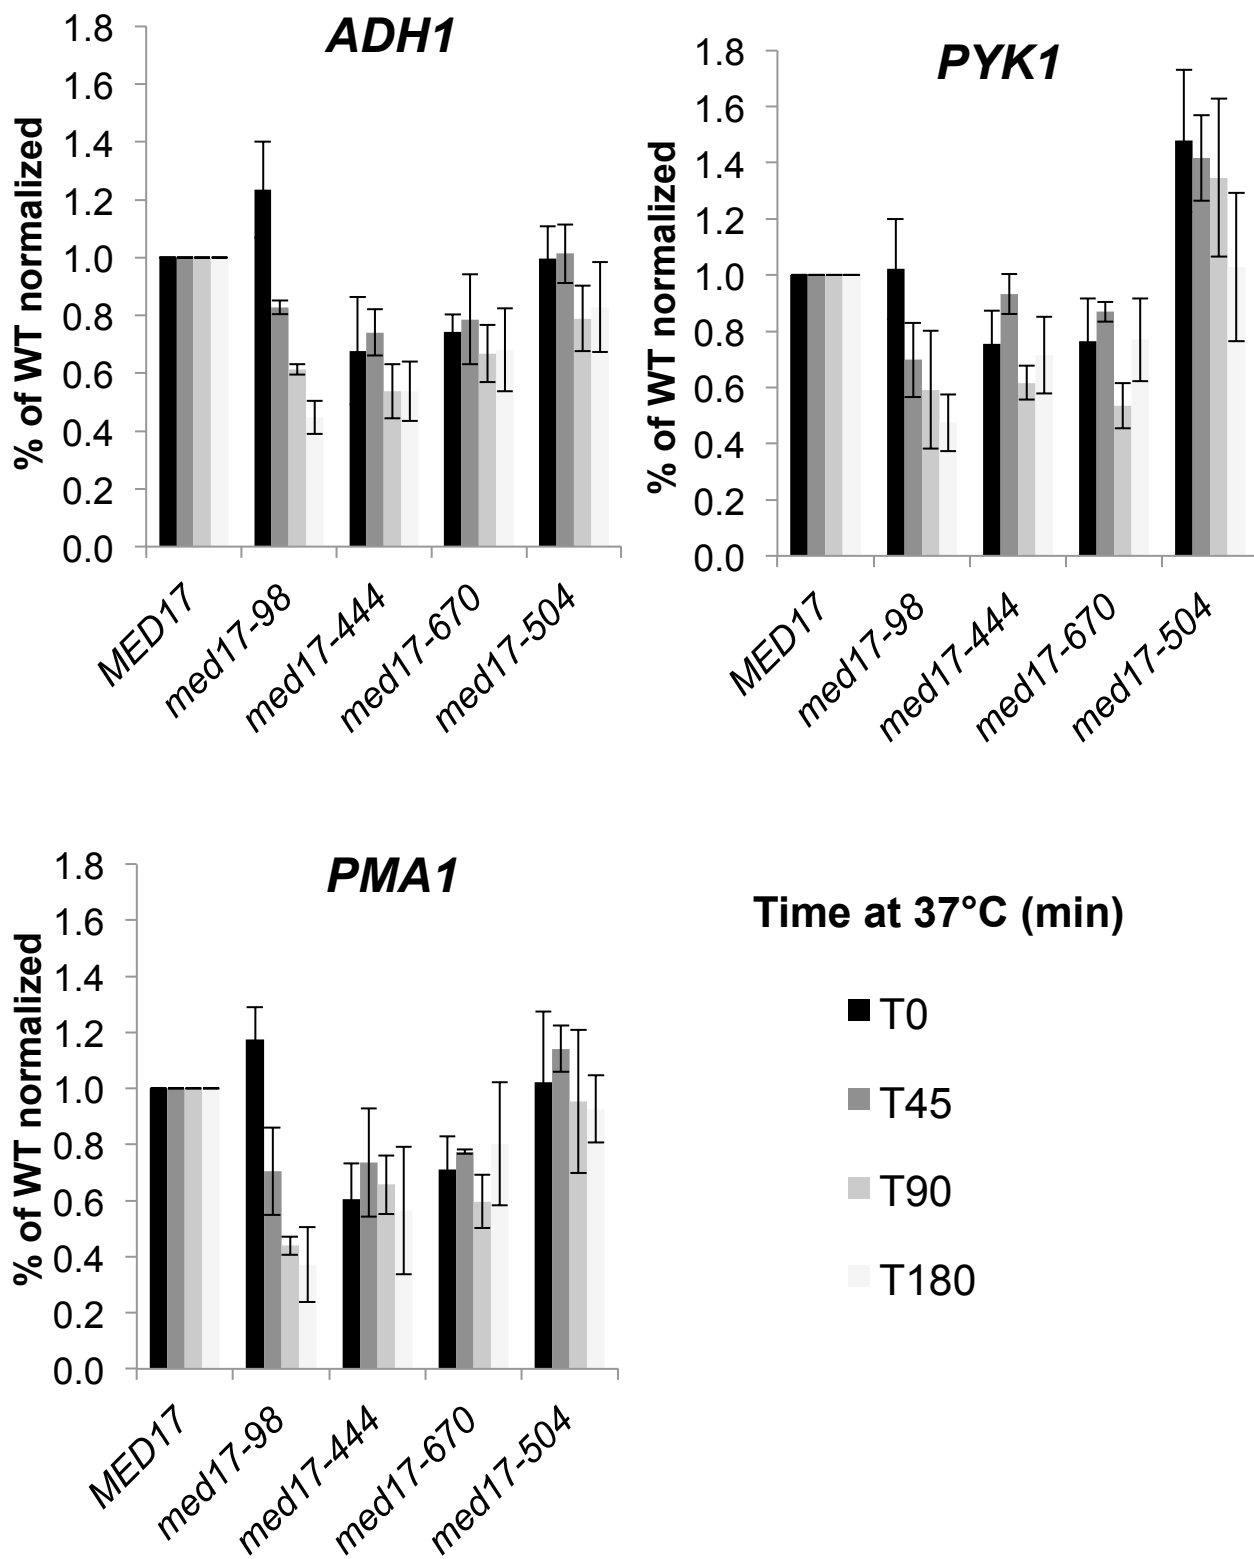

Figure S6

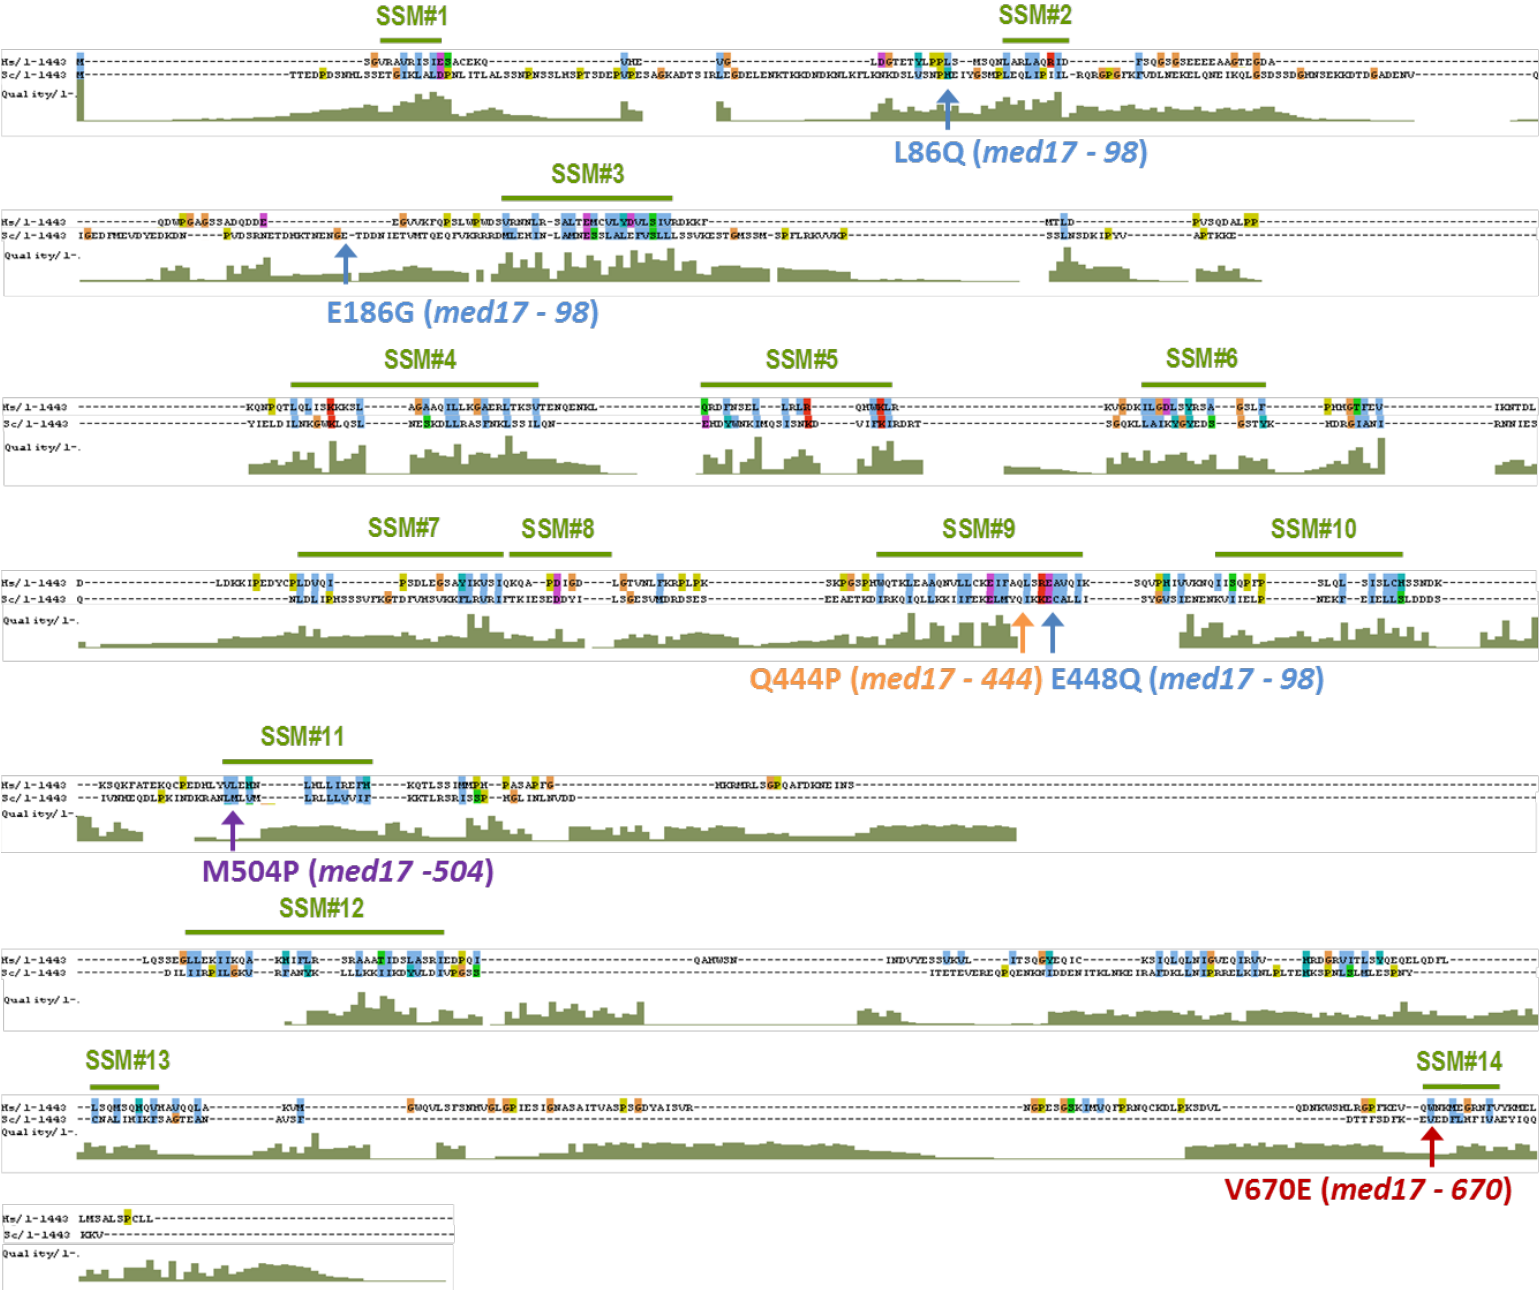

Supplement: supp_gkv782_nar-01527-v-2015-File010.pdf [file supp_gkv782_nar-01527-v-2015-File010.pdf]
